# Supplementary material
Source: HighWire-hosted journal article supplement (https://injuryprevention.bmj.com/content/30/5/373)
Supplement: inline-supplementary-material-1 [file inline-supplementary-material-1.pdf]

## Appendix S1: Copy of the Study Protocol

This manuscript reports baseline data from a going clinical trial. As we do not report on clinical trial outcomes, we did not include the IRB-approved protocol. However, we do include reference to the published study protocol (see citation #15) within the manuscript text. We will be posting our IRB approved protocol to ClinilcaTrials.gov in accordance with all regulations upon completion of the clinical trial and results reporting.

15. Bonar EE, Kidwell KM, Bohnert ASB, et al. Optimizing scalable, technology-supported behavioral interventions to prevent opioid misuse among adolescents and young adults in the emergency department: A randomized controlled trial protocol. *Contemp Clin Trials*. Sep 2021;108:106523. doi:10.1016/j.cct.2021.106523
